# Supplementary material
Source: HighWire-hosted journal article supplement (https://erj.ersjournals.com/content/55/4/2000407)
Supplement: inline-supplementary-material-1 [file inline-supplementary-material-1.pdf]

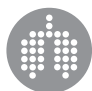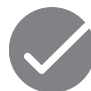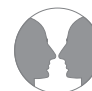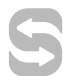

SHAREABLE PDF

# Clinical and CT features of early stage patients with COVID-19: a retrospective analysis of imported cases in Shanghai, China

Shuyi Yang<sup>1</sup>, Yuxin Shi<sup>1</sup>, Hongzhou Lu<sup>2</sup>, Jianqing Xu<sup>3,4</sup>, Feng Li<sup>5</sup>,  
Zhiping Qian<sup>6</sup>, Yebin Jiang<sup>7</sup>, Xinyan Hua<sup>1</sup>, Xueting Ding<sup>1</sup>, Fengxiang Song<sup>1</sup>,  
Jie Shen<sup>1</sup>, Yang Lu<sup>1</sup>, Fei Shan<sup>1,9</sup> and Zhiyong Zhang<sup>1,8,9</sup>

**Affiliations:** <sup>1</sup>Dept of Radiology, Shanghai Public Health Clinical Center, Fudan University, Shanghai, China. <sup>2</sup>Dept of Infectious Disease, Shanghai Public Health Clinical Center, Fudan University, Shanghai, China. <sup>3</sup>Shanghai Public Health Clinical Center and Institutes of Biomedical Sciences, Fudan University, Shanghai, China. <sup>4</sup>State Key Laboratory for Infectious Disease Prevention and Control, Chinese Center for Disease Control and Prevention, Beijing, China. <sup>5</sup>Dept of Respiratory, Shanghai Public Health Clinical Center, Fudan University, Shanghai, China. <sup>6</sup>Dept of Severe Hepatopathy, Shanghai Public Health Clinical Center, Fudan University, Shanghai, China. <sup>7</sup>Cancer Center, University of Michigan, Ann Arbor, MI, USA. <sup>8</sup>Fudan University, Shanghai, China. <sup>9</sup>F. Shan and Z. Zhang contributed equally to this work.

**Correspondence:** Zhiyong Zhang, Fudan University, Shanghai 200433, China. E-mail: zhyzhang@fudan.edu.cn

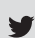

@ERSpublications

**COVID-19 emerged in Wuhan, China, and threatens public health. The clinical and CT features of early stage patients have not previously been characterised. This study aimed to explore the early stage clinical and CT signs.** <http://bit.ly/38Tbq08>

**Cite this article as:** Yang S, Shi Y, Lu H, *et al.* Clinical and CT features of early stage patients with COVID-19: a retrospective analysis of imported cases in Shanghai, China. *Eur Respir J* 2020; 55: 2000407 [<https://doi.org/10.1183/13993003.00407-2020>].

This single-page version can be shared freely online.

## To the Editor:

In December 2019, patients with novel corona virus disease 2019 (COVID-19) emerged in Wuhan, China [1]. The pathogen analysis discovered a new type of coronavirus from infected airway epithelial cells [2], which was named as severe acute respiratory syndrome coronavirus 2 (SARS-CoV-2) [3]. At a time when Chinese people were heading home to celebrate the Spring Festival, many latent cases left Wuhan, which led to the emergence of imported COVID-19 cases across the mainland of China and into some other countries [4, 5]. Shanghai is one of the major cities with imported cases [4, 5].
